# Supplementary material for: Antiproliferative Activity, Multikinase Inhibition, Apoptosis- Inducing Effects and Molecular Docking of Novel Isatin–Purine Hybrids
Source: MDPI journal article supplement (doi:10.3390/medicina59030610), 2023-03-19

**Supplementary data of**

**Anti-proliferative activity, multi-kinase inhibition,  
apoptosis- inducing effects and molecular docking of  
novel isatin-purine hybrids**

Ashwag S. Alanazi<sup>1\*</sup>, Tebyan O. Mirgany<sup>2</sup>, Aisha A. Alsfouk<sup>1</sup>, Nawaf A. Alsaif<sup>2</sup> and  
Mohammed M. Alanazi<sup>2\*</sup>

<sup>1</sup> Department of Pharmaceutical Sciences, College of Pharmacy, Princess Nourah Bint  
Abdulahman University, Riyadh 84428, Saudi Arabia

<sup>2</sup> Department of Pharmaceutical Chemistry, College of Pharmacy, King Saud University,  
P.O. Box 2457, Riyadh 11451, Saudi Arabia

## Compound 2:

ethyl 4-((9H-purin-6-yl)amino)benzoate (2)

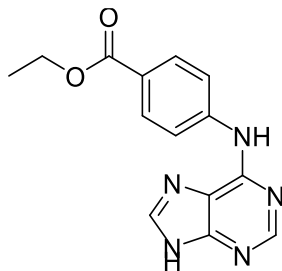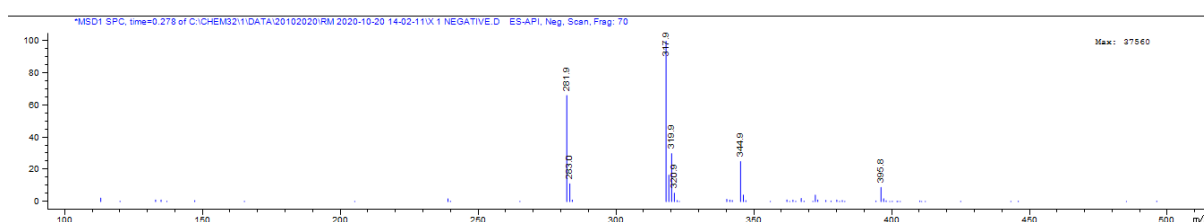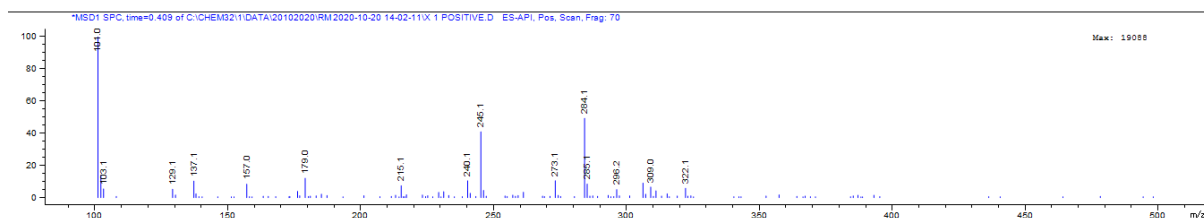

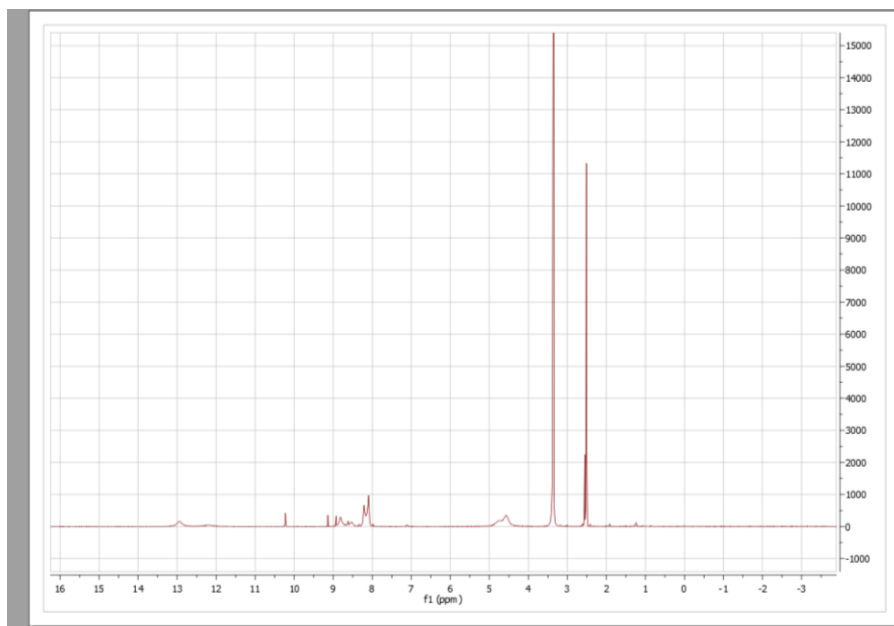

### Compound 3:

4-((9H-purin-6-yl)amino)benzohydrazide (3)

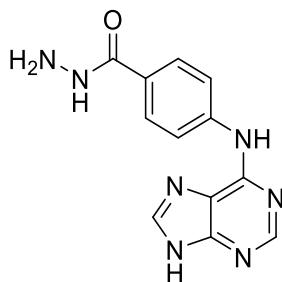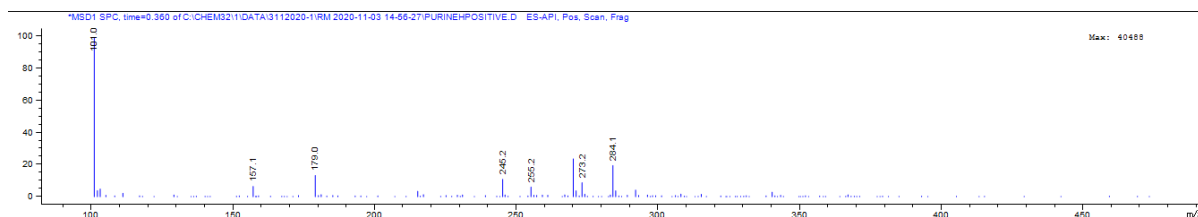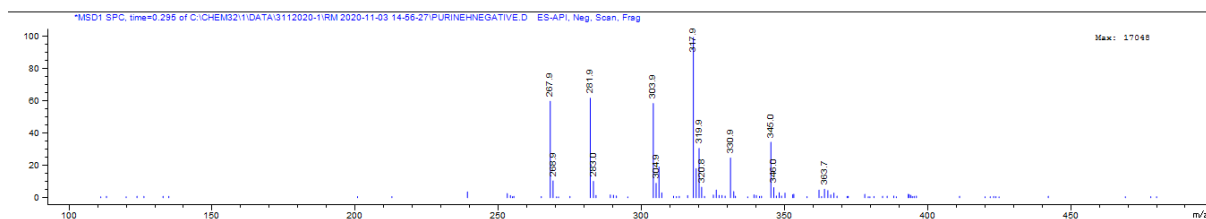

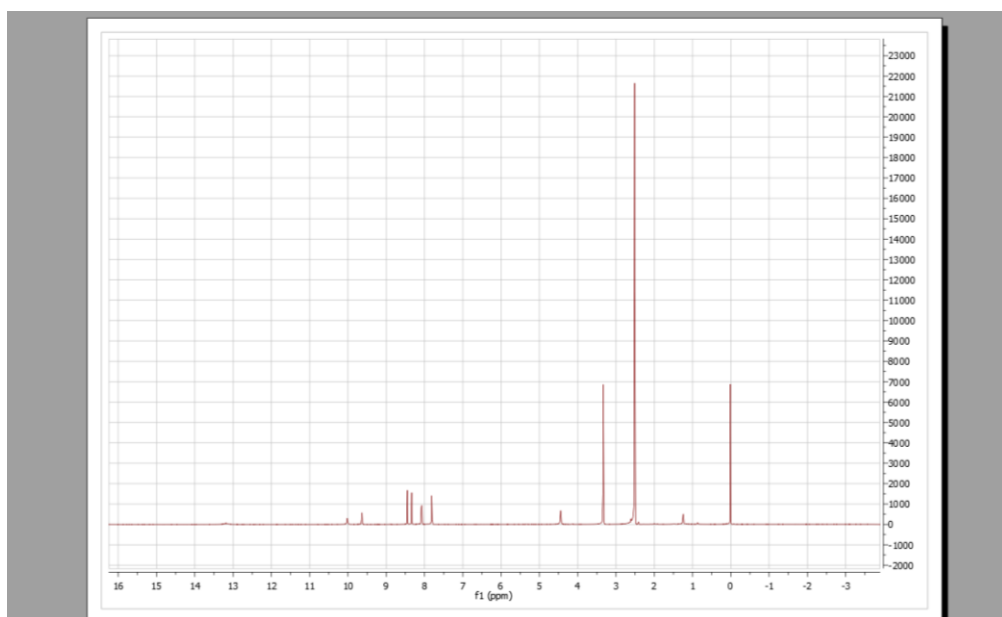

### Compound 4:

**4-((9H-purin-6-yl)amino)-N'-(2-oxoindolin-3-ylidene)benzohydrazide (4)**

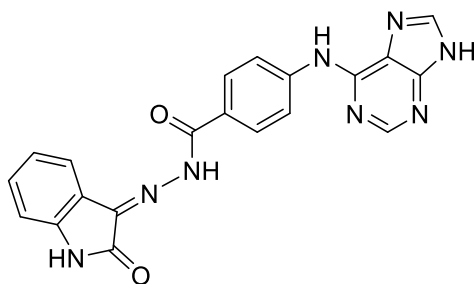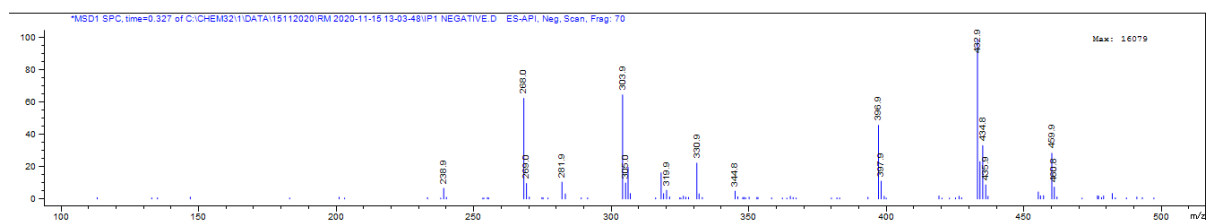

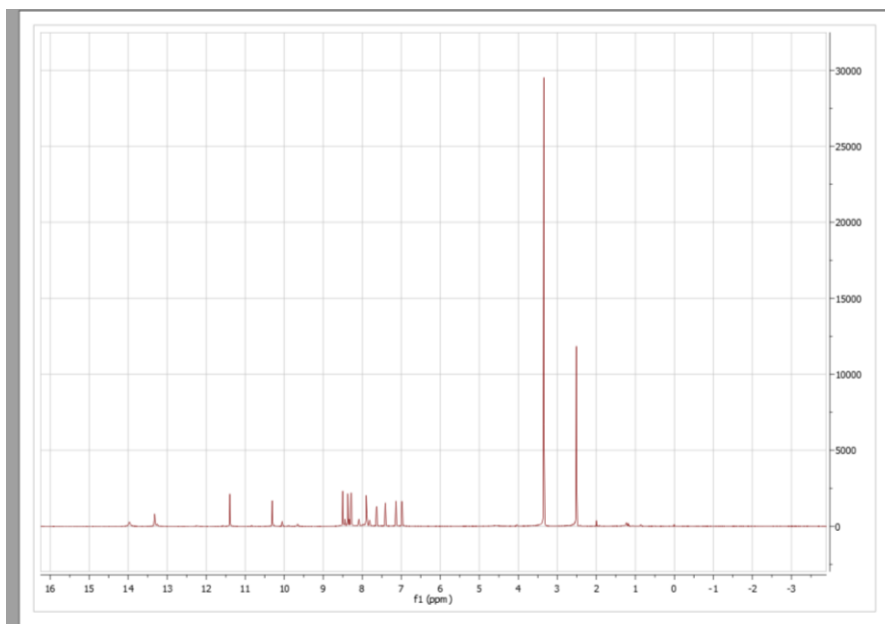

### Compound 5:

**4-((9H-purin-6-yl)amino)-N'-(5-chloro-2-oxoindolin-3-ylidene)benzohydrazide (5)**

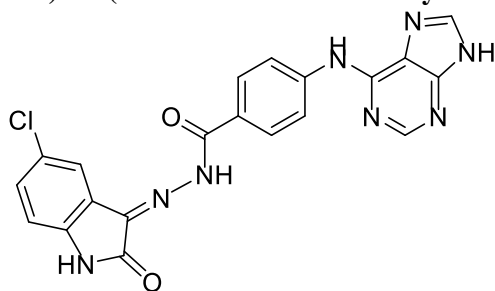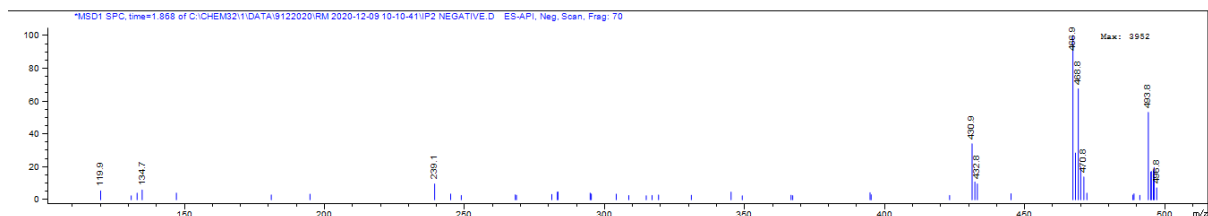

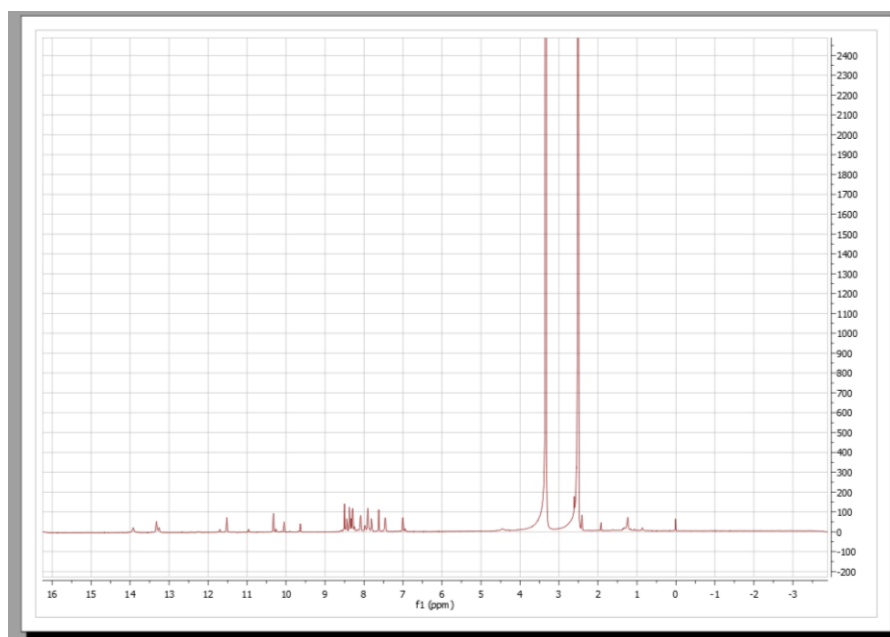

### Compound 6:

**4-((9H-purin-6-yl)amino)-N'-(5-fluoro-2-oxoindolin-3-ylidene)benzohydrazide (6)**

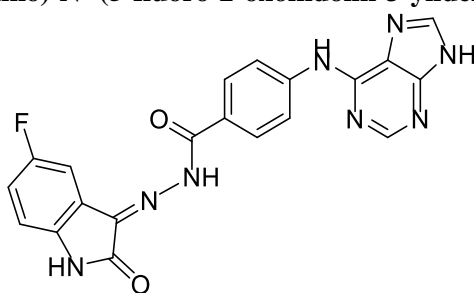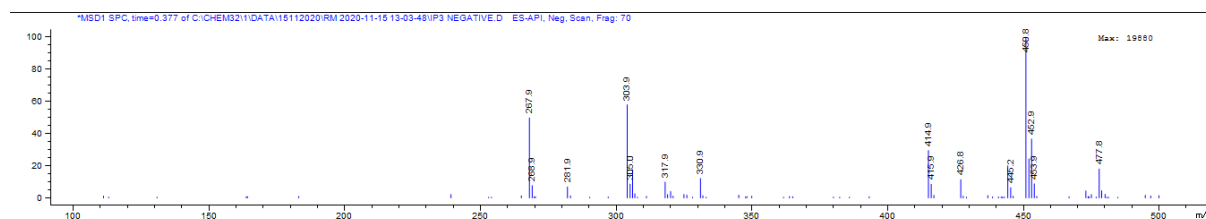

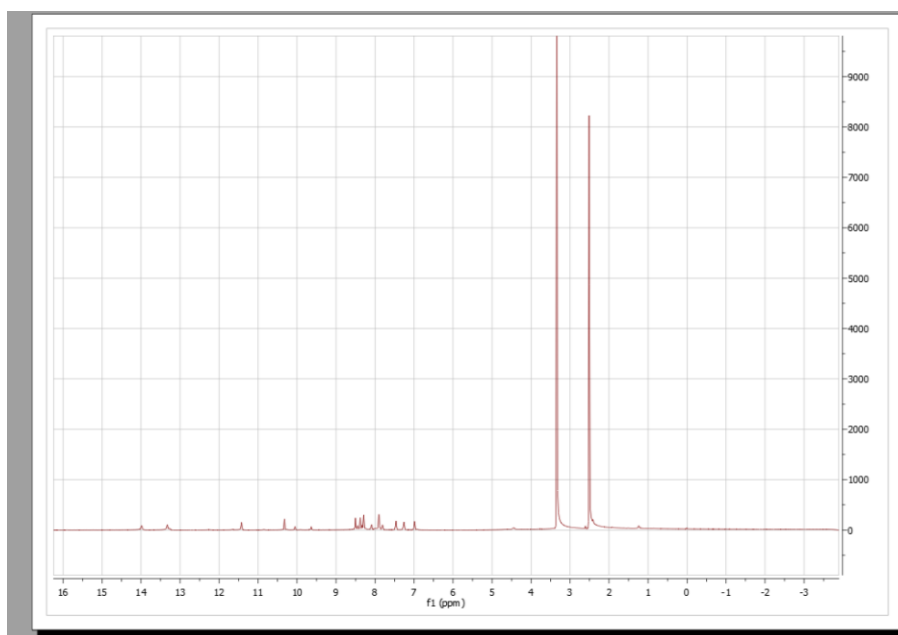

**Compound 7:**

**4-((9H-purin-6-yl)amino)-N'-(5-methyl-2-oxoindolin-3-ylidene)benzohydrazide (7)**

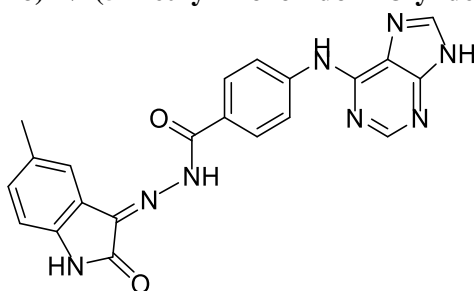

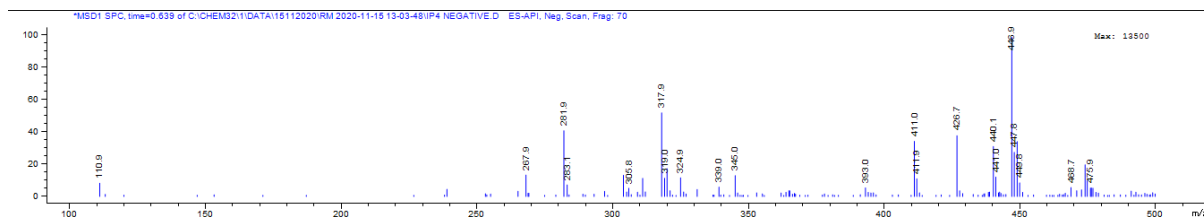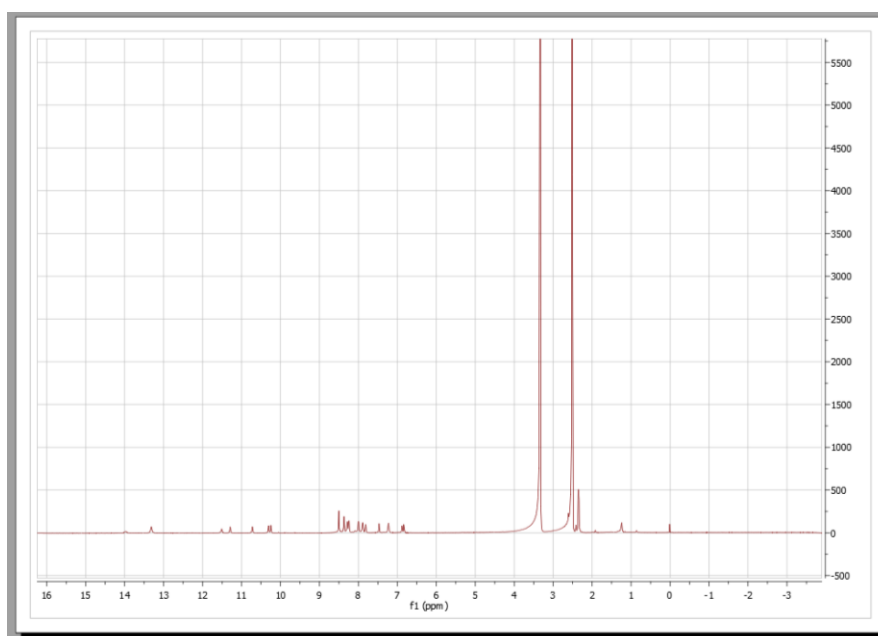

### Compound 8:

**4-((9H-purin-6-yl)amino)-N'-(5-methoxy-2-oxoindolin-3-ylidene)benzohydrazide (8)**

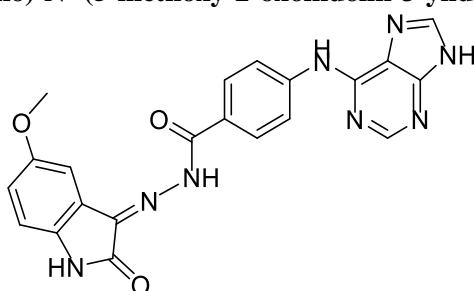



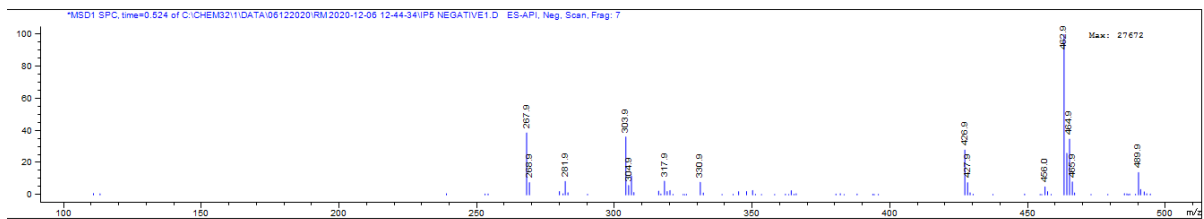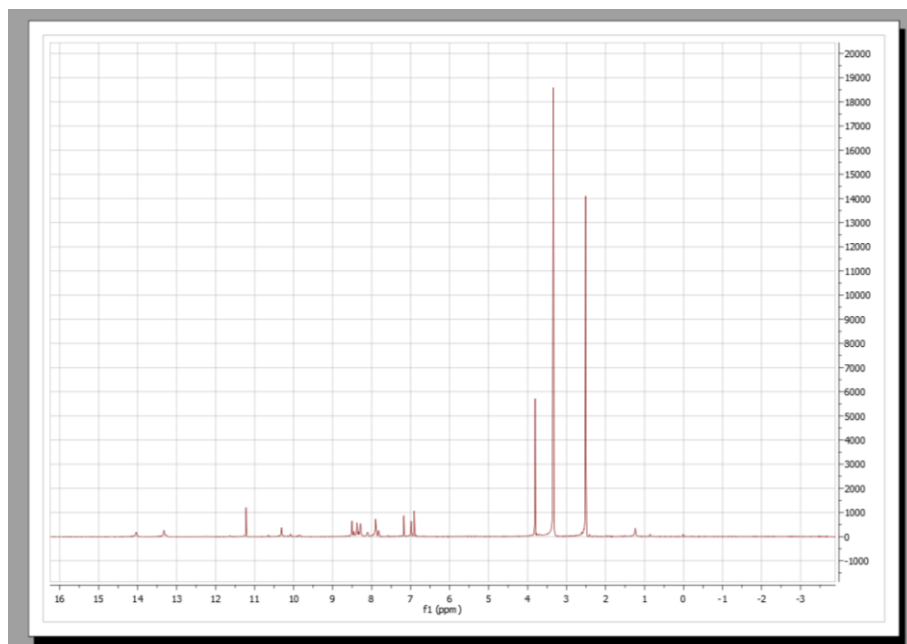

### **Compound 9:**

**4-((9H-purin-6-yl)amino)-N'-(5-nitro-2-oxindolin-3-ylidene)benzohydrazide (9)**

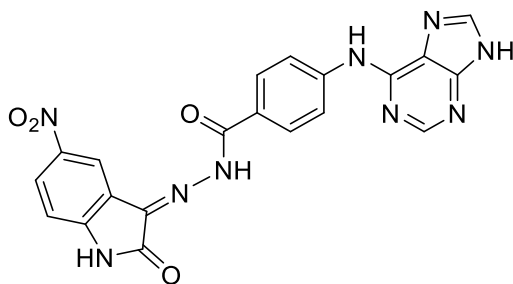

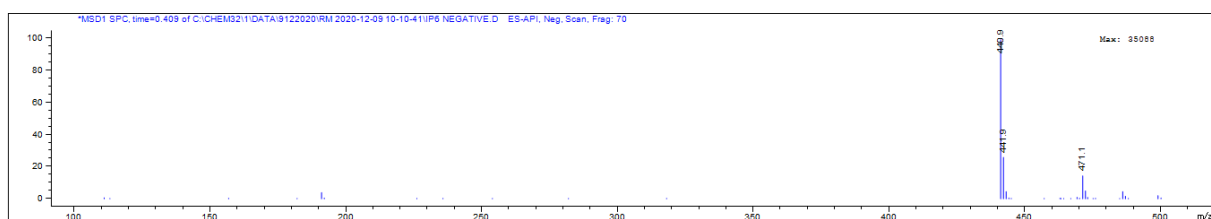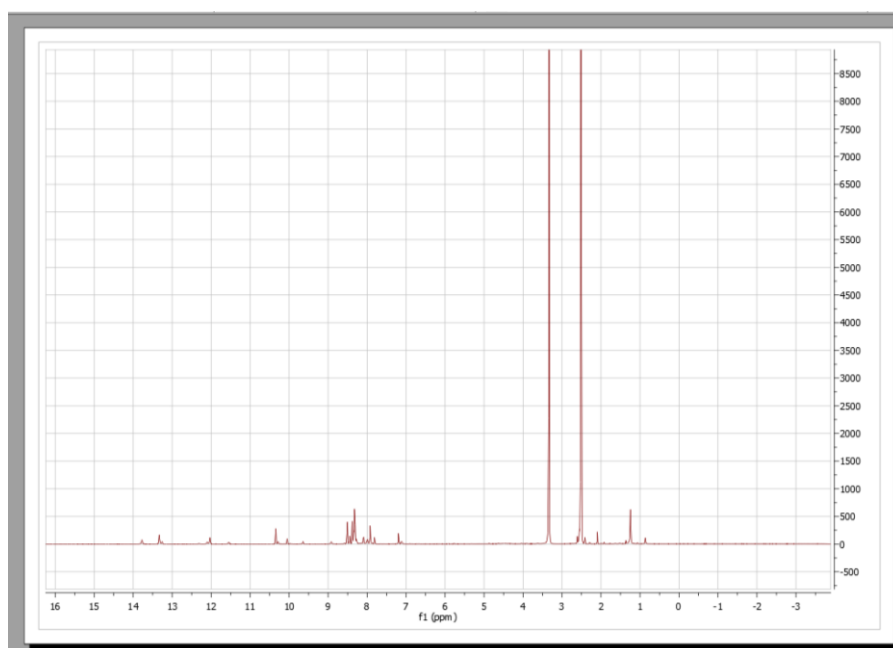

### **Compound 10:**

**6-hydrazineyl-9H-purine (10)**

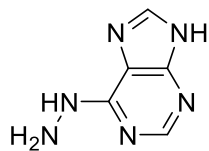

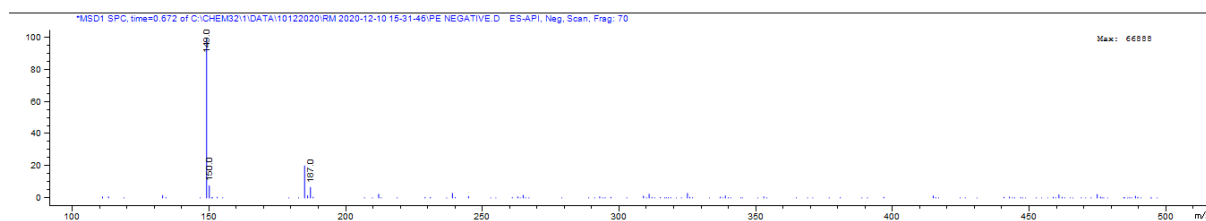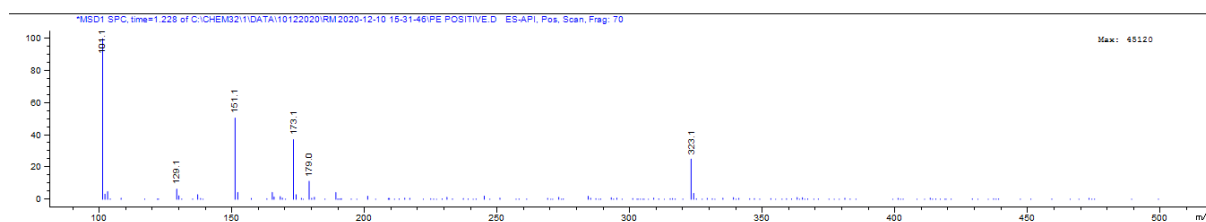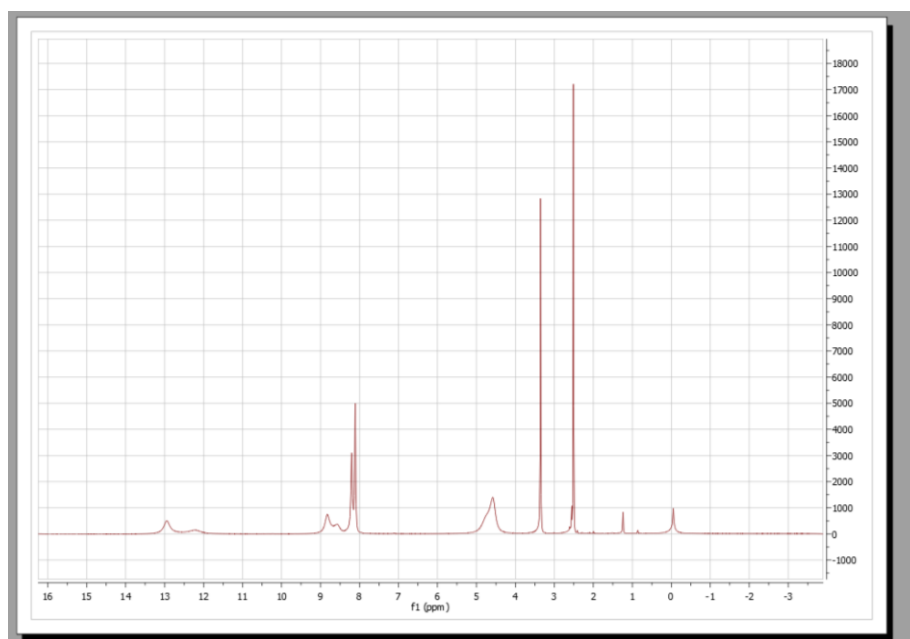

### **Compound 11:**

**(E)-3-(2-(9H-purin-6-yl)hydrazineylidene)indolin-2-one (11)**

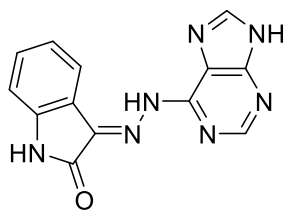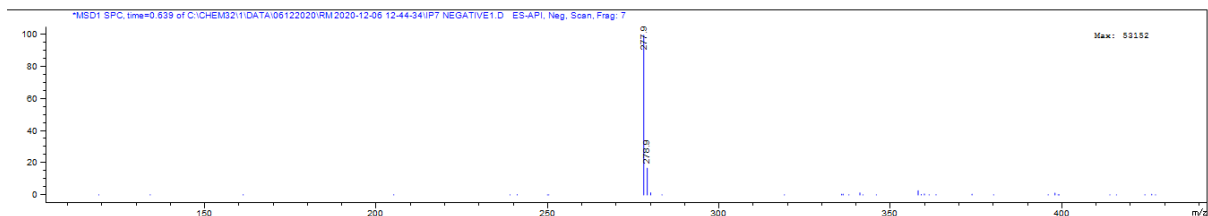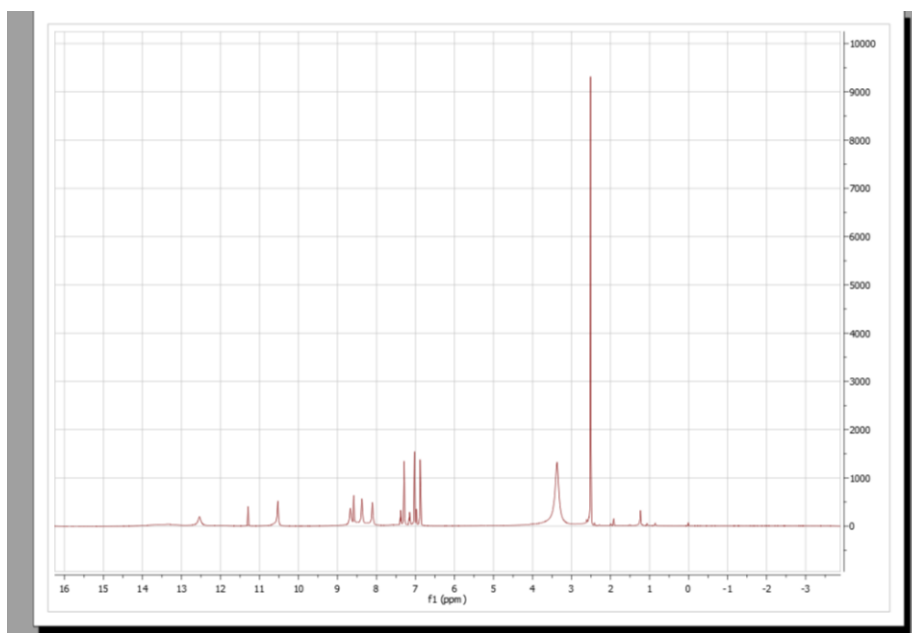

**Compound 12:**

**(E)-3-(2-(9H-purin-6-yl)hydrazineylidene)-5-chloroindolin-2-one (12)**

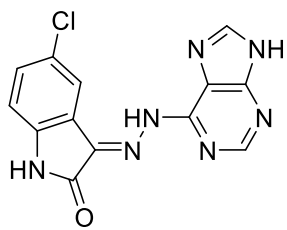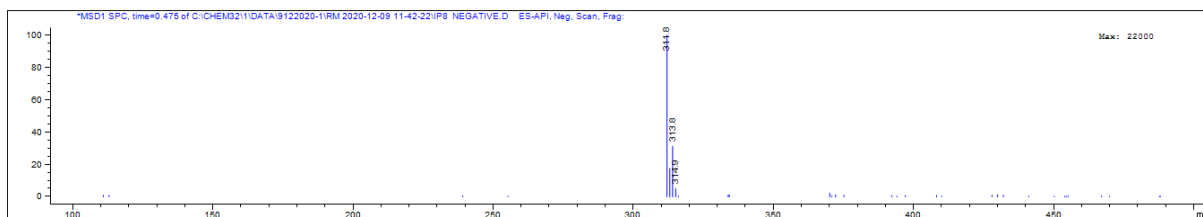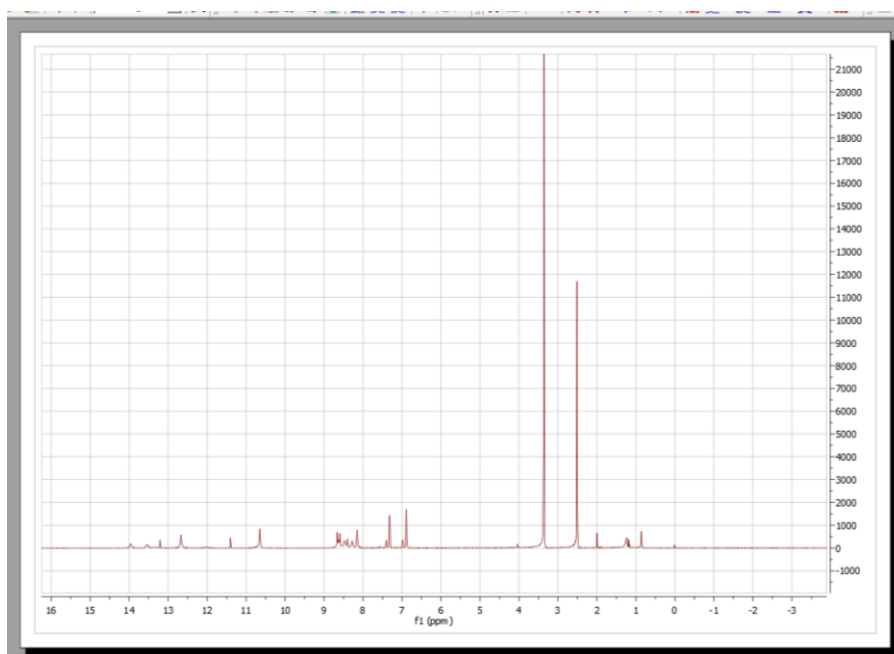

**Compound 13:**

**(E)-3-(2-(9H-purin-6-yl)hydrazineylidene)-5-fluoroindolin-2-one (13)**

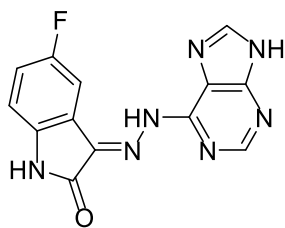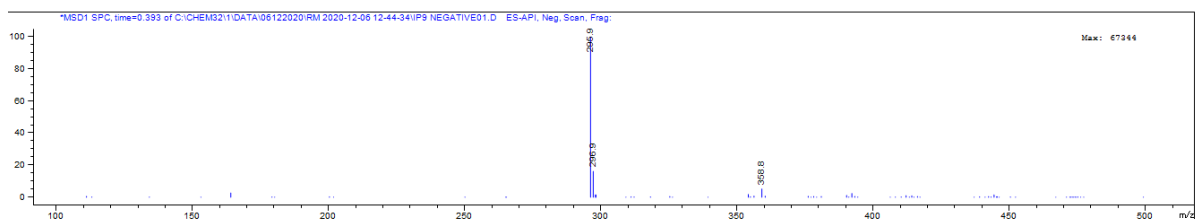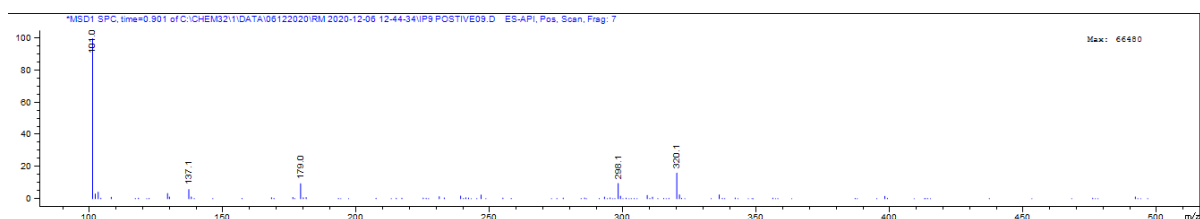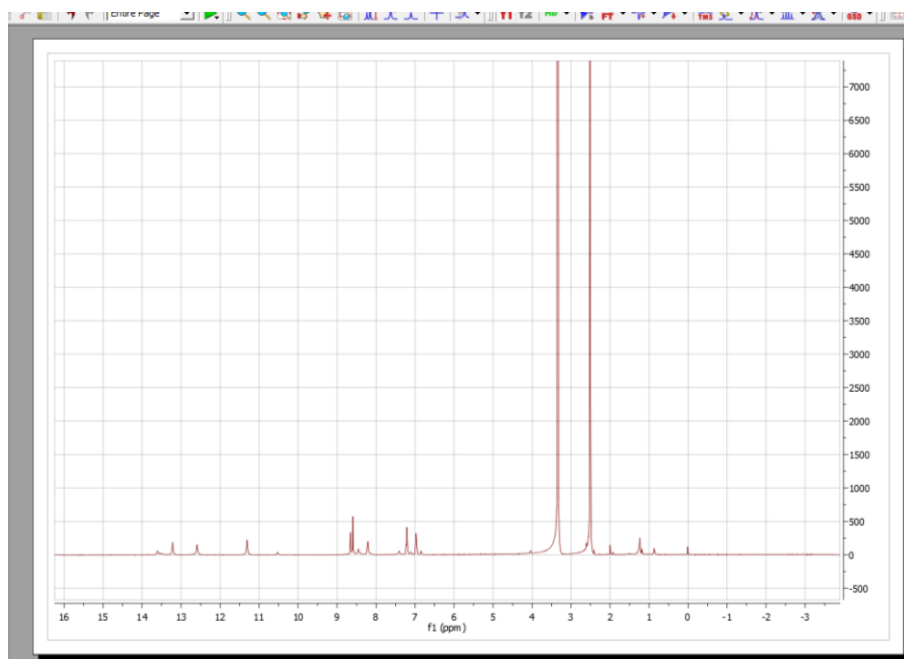

### Compound 14:

**(E)-3-(2-(9H-purin-6-yl)hydrazineylidene)-5-methylindolin-2-one (14)**

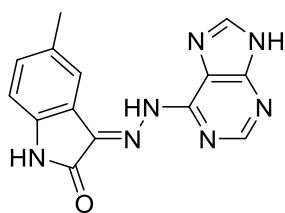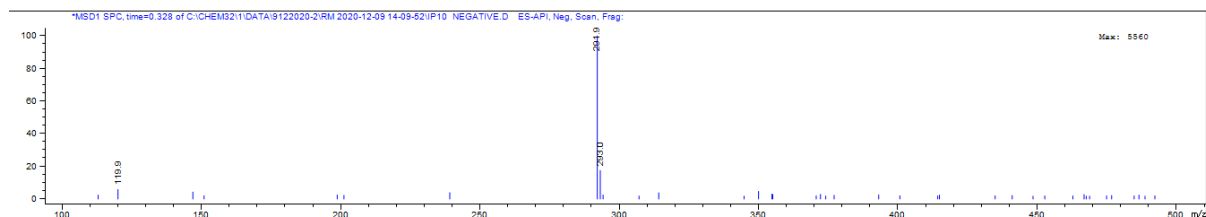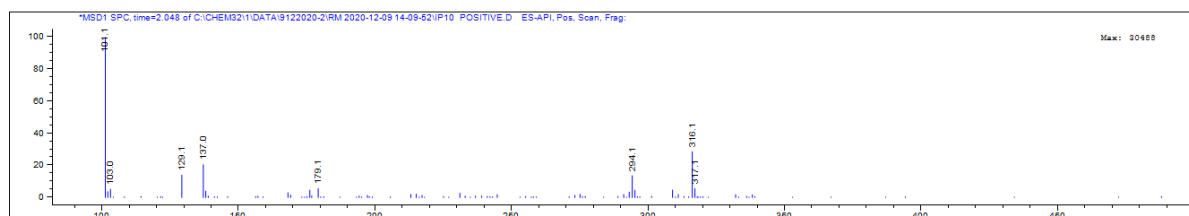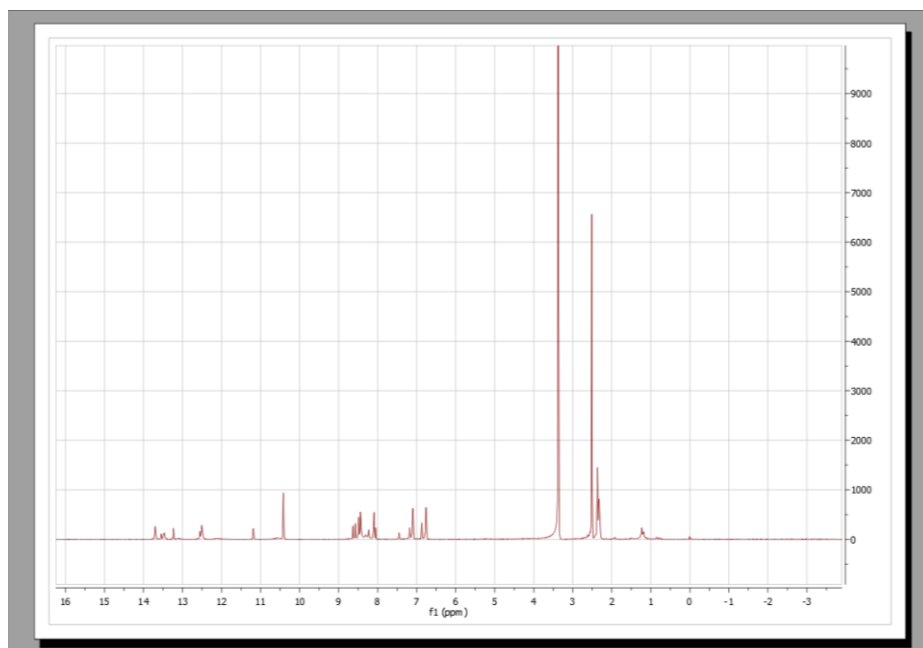

### Compound 15:

**(E)-3-(2-(9H-purin-6-yl)hydrazineylidene)-5-methoxyindolin-2-one (15)**

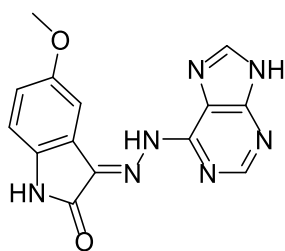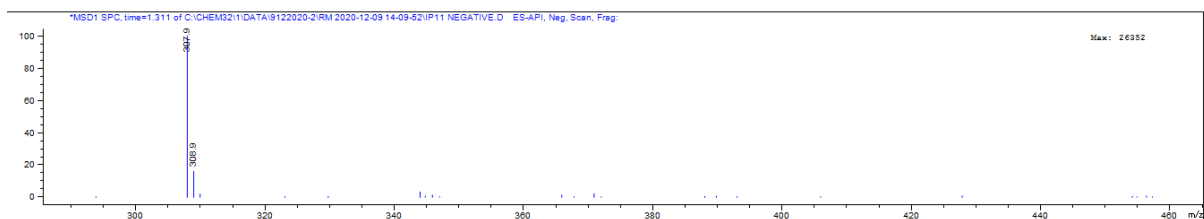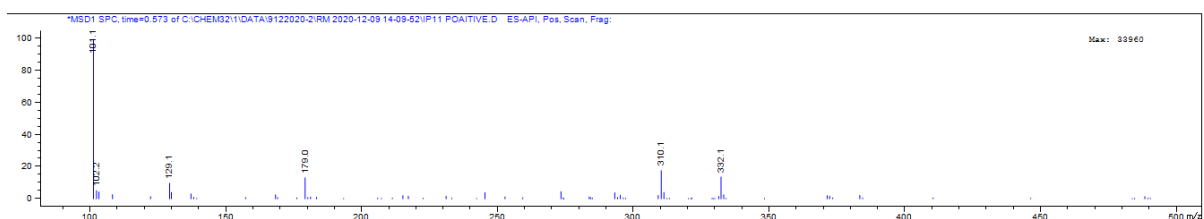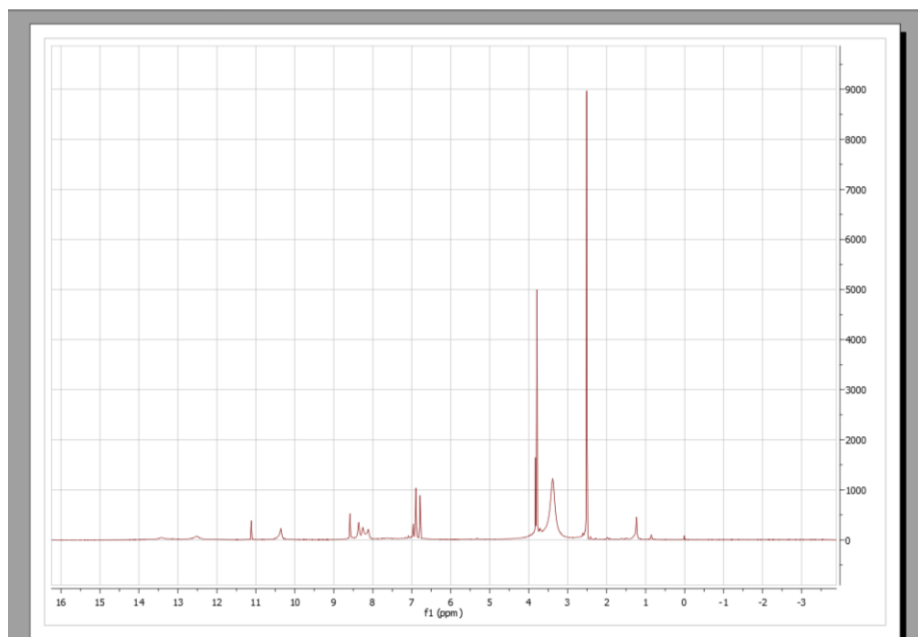

### Compound 16:

**(E)-3-(2-(9H-purin-6-yl)hydrazineylidene)-5-nitroindolin-2-one (16)**



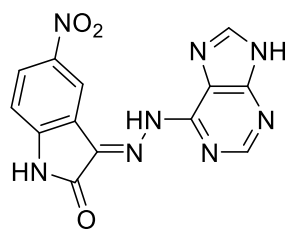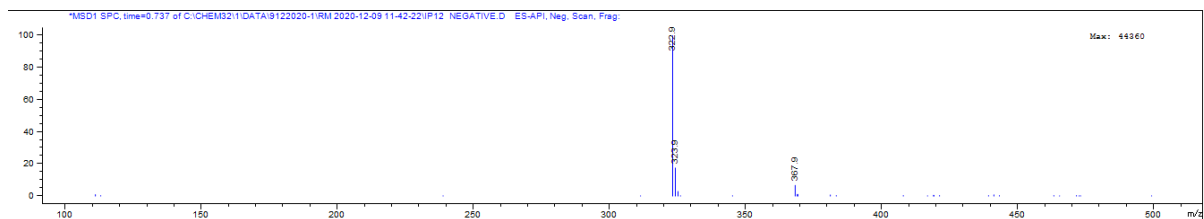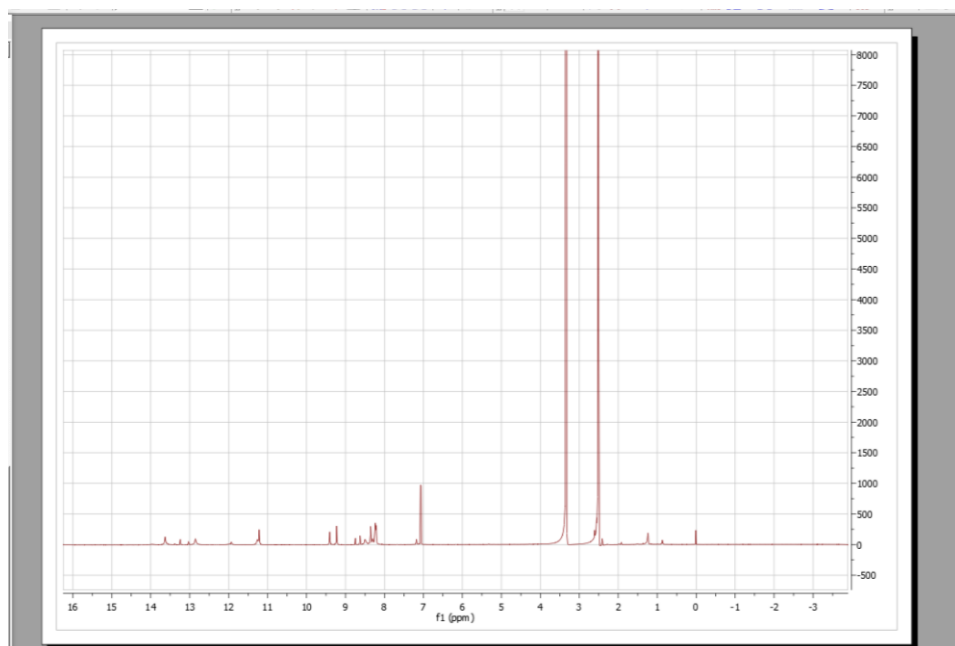

Supplement: s1 [file s1]
